# Supplementary material for: A Simulation Study of the Use of Vaccination to Control Foot-and-Mouth Disease Outbreaks Across Australia
Source: Frontiers journal article supplement (doi:10.3389/fvets.2021.648003), 2021-08-11
Supplement: Data_Sheet_1.PDF [file Data_Sheet_1.PDF]

## *Supplementary Material*

### **I. AADIS - Key model parameters and settings**

**Table I.1 Population structure**

| <b>Herd type</b> | <b>Description</b> | <b>N</b> |
|------------------|--------------------|----------|
| 1                | beef extensive     | 3993     |
| 2                | beef intensive     | 51383    |
| 3                | feedlot            | 508      |
| 4                | mixed beef         | 21556    |
| 5                | mixed sheep        | 21556    |
| 6                | dairy              | 8675     |
| 7                | pigs small         | 1872     |
| 8                | pigs large         | 334      |
| 9                | sheep              | 22150    |
| 10               | smallholder        | 103641   |
|                  | total              | 235668   |

**Table I.2 Within-herd EBM parameters**

| <b>Herd type</b> | <b>beta</b> | <b>Latent period (days)</b> | <b>Infectious period (days)</b> | <b>Clinical period (days)</b> | <b>Days until clinical</b> | <b>Proportion clinical</b> |
|------------------|-------------|-----------------------------|---------------------------------|-------------------------------|----------------------------|----------------------------|
| beef extensive   | 0.7         | 2                           | 4                               | 12                            | 5                          | 1                          |
| beef intensive   | 2           | 2                           | 4                               | 12                            | 5                          | 1                          |
| feedlot          | 8           | 2                           | 4                               | 12                            | 5                          | 1                          |
| mixed beef       | 2           | 2                           | 4                               | 12                            | 5                          | 1                          |
| mixed sheep      | 0.8         | 2                           | 7                               | 5                             | 5                          | 0.5                        |
| dairy            | 6           | 2                           | 4                               | 12                            | 5                          | 1                          |
| pigs small       | 6           | 1                           | 4                               | 10                            | 4                          | 1                          |
| pigs large       | 8           | 1                           | 4                               | 10                            | 4                          | 1                          |
| sheep            | 0.8         | 2                           | 7                               | 5                             | 5                          | 0.5                        |
| smallholder      | 2           | 2                           | 5                               | 9                             | 5                          | 0.75                       |

**Table I.3 Model settings (disease transmission)**

| <b>Parameter</b>                            | <b>Value</b>                          |
|---------------------------------------------|---------------------------------------|
| database name                               | AADIS_CSIRO1                          |
| scenario name                               | csiro_V2_SO1                          |
| scenario start date mode                    | fixed                                 |
| scenario end mode                           | earliest                              |
| scenario fixed length                       | 730                                   |
| scenario num runs                           | 500                                   |
| seed mode                                   | snapshot                              |
| snapshot seed file                          | csiro_V2_scenario_end_snapshot_run_29 |
| pre-infection start offset                  | 21                                    |
| <b>Direct spread</b>                        |                                       |
| direct spread search distance tolerance 1   | 10 km                                 |
| direct spread search distance tolerance 2   | 100 km                                |
| <b>Indirect Spread</b>                      |                                       |
| indirect spread base probability            | 0.05                                  |
| indirect spread min new infections          | 1                                     |
| indirect spread mode new infections         | 2                                     |
| indirect spread max new infections          | 5                                     |
| indirect spread search distance tolerance 1 | 10 km                                 |
| indirect spread search distance tolerance 2 | 100 km                                |
| <b>Local spread</b>                         |                                       |
| local spread base probability               | 0.036                                 |
| local spread base multi herd probability    | 0.5                                   |
| local spread detection weight               | 0.66                                  |
| local spread radius                         | 3 km                                  |
| local spread min new infections             | 1                                     |
| local spread mode new infections            | 2                                     |
| local spread max new infections             | 5                                     |
| <b>Airborne spread</b>                      |                                       |
| airborne spread plume distance base         | 0.113                                 |
| airborne spread plume distance exp          | 1.367                                 |
| airborne spread plume distance max          | 20 km                                 |
| airborne spread decay mode                  | linear                                |
| airborne spread min new infections          | 1                                     |
| airborne spread mode new infections         | 2                                     |
| airborne spread max new infections          | 5                                     |
| grid-based weather data                     | TRUE                                  |
| <b>Saleyard spread</b>                      |                                       |
| saleyard spread mode                        | regular                               |
| saleyard spread search distance tolerance 1 | 20 km                                 |
| saleyard spread search distance tolerance 2 | 100 km                                |

**Table I.4 Model settings (control)**

| <b>Parameter/setting</b>                 | <b>Value</b> |
|------------------------------------------|--------------|
| Control measures enabled                 | TRUE         |
| movement restrictions enabled            | TRUE         |
| SP reporting enabled                     | TRUE         |
| SP false report ratio                    | 2.34         |
| SP moving average                        | 3            |
| SP false report RA ratio                 | 0.6          |
| SP false report CA ratio                 | 0.3          |
| SP false report OA ratio                 | 0.1          |
| direct tracing enabled                   | TRUE         |
| indirect tracing enabled                 | TRUE         |
| false traces enabled                     | TRUE         |
| tracing backwards window                 | 14 days      |
| tracing forwards window                  | 14 days      |
| surveillance enabled                     | TRUE         |
| surveillance local radius                | 3 km         |
| surveillance min clinical prevalence     | 0.05         |
| surveillance min days infected           | 10           |
| surveillance lab results required        | TRUE         |
| surveillance lab results delay           | 1 day        |
| surveillance overdue DCP SP TP threshold | 2            |
| IP operations enabled                    | TRUE         |
| vaccination enabled                      | FALSE        |
| vaccination start day                    | 14           |
| vaccination start IP count               | 0            |
| vaccination immunity lag                 | 6            |
| resources enabled                        | TRUE         |

**Table I.5 Scenario settings (control)**

| <b>Parameter</b>                                                   | <b>Setting</b>                                                    |
|--------------------------------------------------------------------|-------------------------------------------------------------------|
| Time to detect first infected property (days)                      | 21                                                                |
| National livestock standstill period (days)                        | 3                                                                 |
| Control Area (CA) initial size                                     | Whole state/territory                                             |
| Restricted Area (RA) initial size                                  | Local government area (LGA)                                       |
| Days into the control program before CA and RA are reduced in size | 14 and a further 14                                               |
| Control Area (CA) subsequent size                                  | Radial zone around IP of 50 km radius, then 10 km radius          |
| Restricted Area (RA) subsequent size                               | Radial zone around IP of 10 km, then 3 km radius                  |
| Vaccination start                                                  | 14 days into control program                                      |
| Vaccination zone                                                   | ring (5 km) or annulus (5-10 km) around IPs depending on strategy |
| Species vaccinated                                                 | Variable depending on strategy                                    |

**Table I.6 Resources for control**

| <b>Jurisdiction</b> | <b>Surveillance teams</b> |     | <b>Culling teams</b> |     | <b>Disposal teams</b> |     | <b>Disinfection teams</b> |     | <b>Vaccination teams</b> |      |
|---------------------|---------------------------|-----|----------------------|-----|-----------------------|-----|---------------------------|-----|--------------------------|------|
|                     | initial                   | max | initial              | max | initial               | max | initial                   | max | initial                  | max  |
| NSW                 | 5                         | 60  | 2                    | 15  | 3                     | 20  | 10                        | 100 | 20                       | 500  |
| Vic                 | 3                         | 50  | 1                    | 13  | 3                     | 20  | 10                        | 100 | 12                       | 500  |
| Qld                 | 5                         | 40  | 1                    | 13  | 2                     | 14  | 8                         | 100 | 20                       | 500  |
| SA                  | 5                         | 20  | 1                    | 8   | 2                     | 10  | 7                         | 100 | 15                       | 500  |
| WA                  | 4                         | 30  | 1                    | 10  | 2                     | 11  | 5                         | 100 | 10                       | 500  |
| Tas                 | 4                         | 15  | 1                    | 5   | 2                     | 7   | 5                         | 100 | 15                       | 500  |
| NT                  | 2                         | 15  | 1                    | 5   | 2                     | 8   | 5                         | 100 | 5                        | 500  |
| Australia           | 17                        | 138 | 5                    | 41  | 9                     | 54  | 30                        | 420 | 58                       | 2100 |

## II. Stakeholder consultation survey questions

**Table II.1 Questions from stakeholder workshops**

|                                                                                                                                    |
|------------------------------------------------------------------------------------------------------------------------------------|
| 1. Name?                                                                                                                           |
| 2. What is your day-to-day area of responsibility?                                                                                 |
| 3. What role would you play during the event of a FMD or other EAD outbreak?                                                       |
| 4. What kinds of challenges would you expect to encounter during an outbreak? (I.e. what could go wrong?)                          |
| 5. What kinds of economic impacts would you expect as the result of an FMD outbreak?                                               |
| 6. Which of these are most concerning?                                                                                             |
| 7. What kinds of economic impacts would you expect as the result of the <i>management response</i> to an FMD outbreak?             |
| 8. Which of these are most concerning?                                                                                             |
| 9. What kind of economic considerations do you think would most influence <i>decision-making processes</i> during an FMD outbreak? |

**Table II.2 Questions from expert elicitation on FMD outbreak scenarios and control strategies**

| <b>1. What are the most important or relevant <u>scenarios</u> for an outbreak of FMD in your jurisdiction? Please provide a description of 3 scenarios.</b> |              |                                                        |                                                    |                       |                                                    |
|--------------------------------------------------------------------------------------------------------------------------------------------------------------|--------------|--------------------------------------------------------|----------------------------------------------------|-----------------------|----------------------------------------------------|
|                                                                                                                                                              | <b>When</b>  | <b>How</b>                                             | <b>What species and farm type and where</b>        | <b>Time to detect</b> | <b>Why is this scenario important or relevant?</b> |
| <i>Example</i>                                                                                                                                               | <i>April</i> | <i>Introduction of FMD through contaminated salami</i> | <i>Backyard pig farm in greater Melbourne area</i> | <i>3 weeks</i>        |                                                    |
| <b>Scenario 1</b>                                                                                                                                            |              |                                                        |                                                    |                       |                                                    |
| <b>Scenario 2</b>                                                                                                                                            |              |                                                        |                                                    |                       |                                                    |
| <b>Scenario 3</b>                                                                                                                                            |              |                                                        |                                                    |                       |                                                    |

| <b>2. Please list the control strategies that are of most interest or importance to your jurisdiction in the event of an FMD outbreak. Please provide information on the following areas. Please note you can provide more than 3 options.</b>                                           |                                            |                                                                                                                           |                 |
|------------------------------------------------------------------------------------------------------------------------------------------------------------------------------------------------------------------------------------------------------------------------------------------|--------------------------------------------|---------------------------------------------------------------------------------------------------------------------------|-----------------|
| <b>Control measure</b>                                                                                                                                                                                                                                                                   | <b>Option 1</b>                            | <b>Option 2</b>                                                                                                           | <b>Option 3</b> |
| <b>Standstill period (days)</b><br>Period of time at the start of the outbreak that the national livestock standstill is in force                                                                                                                                                        | e.g. 7                                     | e.g. 10                                                                                                                   |                 |
| <b>Movement control areas (RA and CA) (km)</b><br>Area around IP where movement restrictions apply. <i>You may also want to consider that this area can be reduced in size after a designated period of time. If relevant please list the time period (days) and new area size (km).</i> | e.g. RA 3km around IP and CA 5km around IP | e.g. RA in the local district area and CA the whole state then after 14 days reduce RA and CA to 3km and 5km respectively |                 |

|                                                                                                                                                                                                                                                                                                                       |                                                                        |                                                                                      |                                                                                |
|-----------------------------------------------------------------------------------------------------------------------------------------------------------------------------------------------------------------------------------------------------------------------------------------------------------------------|------------------------------------------------------------------------|--------------------------------------------------------------------------------------|--------------------------------------------------------------------------------|
| <b>Control strategy</b><br>How to manage the outbreak using stamping out (cull IP) plus or minus other strategies such as destruction of DC, pre-emptive destruction on ARP, <i>etc.</i><br>Vaccination to be considered below.                                                                                       | <i>e.g. stamping out alone</i>                                         | <i>e.g. stamping out plus cull DC</i>                                                | <i>e.g. stamping out plus pre-emptive ring cull 2km around IP</i>              |
| <b>Vaccination control strategy (if vaccination is used)</b>                                                                                                                                                                                                                                                          |                                                                        |                                                                                      |                                                                                |
| <b>Vaccination program trigger</b><br>The conditions under which a vaccination program is commenced                                                                                                                                                                                                                   | <i>e.g. day 14 of the control program</i>                              | <i>e.g. once 10 IP have been declared</i>                                            |                                                                                |
| <b>Vaccination ring size (km)</b><br>Area around IP to vaccinate. These areas can be immediately around IP (so acts to suppress spread) or a ‘donut’ a specified distance from the IP (so acts like a protective buffer and often surrounds the RA). In the latter please indicate the inner and outer ring distance. | <i>e.g. 3km around IP (inner radius 0km from IP, outer radius 3km)</i> | <i>e.g. 2km donut around IP (inner radius 3km from IP, outer radius 5km from IP)</i> |                                                                                |
| <b>Species and/or farms to vaccinate</b><br>For example cattle only, mixed sheep and cattle farms only, dairy farms only, intensive beef and dairy farms, all farms except smallholder farms <i>etc.</i>                                                                                                              | <i>e.g. dairy farms only</i>                                           | <i>e.g. cattle (excluding feedlots) and sheep only</i>                               | <i>e.g. all farms except smallholders and pigs</i>                             |
| <b>Order of vaccination</b><br>Vaccinate from the outside of the ring to the inside or vice-versa                                                                                                                                                                                                                     | <i>e.g. inside-out</i>                                                 | <i>e.g. inside-out</i>                                                               |                                                                                |
| <b>How to start vaccinating</b><br>Whether vaccination rings should only be established around IP declared after the vaccination program has commenced                                                                                                                                                                | <i>e.g. vaccinate around new IP only</i>                               | <i>e.g. vaccinate around ALL IP</i>                                                  | <i>e.g. vaccinate around new IP and any IP declared in the previous 7 days</i> |
| <b>Area to vaccinate</b><br>Vaccinate in high risk areas (high animal densities) only or in all areas                                                                                                                                                                                                                 | <i>e.g. high risk areas only</i>                                       | <i>e.g. all areas</i>                                                                |                                                                                |
